# Supplementary material for: Genome-Wide Analysis, Modeling, and Identification of Amino Acid Binding Motifs Suggest the Involvement of GH3 Genes during Somatic Embryogenesis of Coffea canephora
Source: MDPI journal article supplement (doi:10.3390/plants10102034), 2021-09-28
Supplement: s1 [file s1]

**Table S2.** Gretchen Hagen (*GH3*) genes identified in some sequenced plant genomes.

| Species                        | <sup>1</sup> Genome Size (Mb) | <sup>2</sup> Members of Group I | <sup>3</sup> Members of Group II | Members of Group III | Total members of GH3 family | Reference  |
|--------------------------------|-------------------------------|---------------------------------|----------------------------------|----------------------|-----------------------------|------------|
| <i>Arabidopsis thaliana</i>    | 120.69                        | 2                               | 8                                | 9                    | 19                          | [16]       |
| <i>Brassica napus</i>          | 848.20                        | 8                               | 22                               | 36                   | 66                          | [23]       |
| <i>Brassica oleracea</i>       | 554.98                        | 4                               | 9                                | 12                   | 25                          | [23]       |
| <i>Brassica rapa</i>           | 234.69                        | 4                               | 10                               | 24                   | 38                          | [23]       |
| <i>Populus euphratica</i>      | 496.033                       | 4                               | 6                                | 4                    | 14                          | [45]       |
| <i>Populus trichocarpa</i>     | 434.29                        | 4                               | 6                                | 3                    | 13                          | [14]       |
| <i>Prunus persica</i>          | 227.57                        | 2                               | 3                                | 3                    | 8                           | [14]       |
| <i>Triticum aestivum</i>       | 14,471.4                      | 10                              | 10                               | 16                   | 36                          | [46]       |
| <i>Vitis vinifera</i>          | 486.20                        | 3                               | 6                                | --                   | 9                           | [21]       |
| <i>Zea mays</i>                | 2243.62                       | 5                               | 8                                | --                   | 13                          | [47]       |
| <i>Actinidia chinensis</i>     | 653.93                        | 4                               | 11                               | --                   | 12                          | [48]       |
| <i>Brachypodium distachyon</i> | 218.01                        | 2                               | 6                                | --                   | 8                           | [49]       |
| <i>Carica papaya</i>           | 370.42                        | 2                               | 4                                | --                   | 6                           | [50]       |
| <i>Cicer arietinum</i>         | 347.25                        | 2                               | 5                                | --                   | 11                          | [51]       |
| <i>Coffea canephora</i>        | 568.612                       | 1                               | 17                               | --                   | 18                          | This study |
| <i>Glycine max</i>             | 1,116.18                      | 8                               | 16                               | --                   | 24                          | [52]       |
| <i>Hordeum vulgare</i>         | 233.13                        | 2                               | 7                                | --                   | 9                           | [49]       |
| <i>Malus domestica</i>         | 660.46                        | 5                               | 10                               | --                   | 15                          | [53]       |
| <i>Medicago truncatula</i>     | 429.61                        | 6                               | 7                                | --                   | 14                          | [54]       |
| <i>Oriza sativa</i>            | 490.15                        | 4                               | 9                                | --                   | 13                          | [55]       |
| <i>Physcomitrella patens</i>   | 472.08                        | 2                               | --                               | --                   | 2                           | [45]       |
| <i>Setaria italica</i>         | 477.54                        | 6                               | 11                               | --                   | 17                          | [49]       |
| <i>Solanum lycopersicum</i>    | 812.994                       | 9                               | 6                                | --                   | 15                          | [22]       |
| <i>Solanum tuberosum</i>       | 772.25                        | 4                               | 9                                | --                   | 13                          | [33]       |
| <i>Sorghum bicolor</i>         | 374.25                        | 4                               | 7                                | --                   | 11                          | [49]       |
| <i>Theobroma cacao</i>         | 324.88                        | 2                               | 17                               | --                   | 19                          | [52]       |
