# Supplementary material for: Genome-Wide Analysis, Modeling, and Identification of Amino Acid Binding Motifs Suggest the Involvement of GH3 Genes during Somatic Embryogenesis of Coffea canephora
Source: MDPI journal article supplement (doi:10.3390/plants10102034), 2021-09-28
Supplement: s1 [file s1]

**Table S5.** Information of templates used for the construction of 3D proteins.

| Protein   | ID          | Oligo-State | Sequence Identity | Coverage | QMEAN | Template | Method           | Description                                                                                                                          |
|-----------|-------------|-------------|-------------------|----------|-------|----------|------------------|--------------------------------------------------------------------------------------------------------------------------------------|
| CcGH3.1b  | Cc00_g01360 | Monomer     | 60.69 %           | 0.98     | -1.22 | 4b2g.1.A | X-ray,<br>2.40 Å | Crystal Structure of an Indole-3-Acetic Acid Amido Synthase from <i>Vitis vinifera</i> Involved in Auxin Homeostasis                 |
| CcGH3.5   | Cc05_g06700 | Monomer     | 36.09 %           | 0.96     | -0.83 | 5kod.3.A | X-ray,<br>2.20 Å | Crystal Structure of GH3.5 Acyl Acid Amido Synthetase from <i>Arabidopsis thaliana</i> . Indole-3-acetic acid-amido synthetase GH3.5 |
| CcGH3.6a  | Cc05_g05640 | Monomer     | 74.38 %           | 1.00     | 0.23  | 5kod.1.A | X-ray,<br>2.20 Å | Crystal Structure of GH3.5 Acyl Acid Amido Synthetase from <i>Arabidopsis thaliana</i> . Indole-3-acetic acid-amido synthetase GH3.5 |
| CcGH3.6b  | Cc05_g12940 | Monomer     | 81.70 %           | 0.99     | -0.06 | 5kod.2.A | X-ray,<br>2.20 Å | Crystal Structure of GH3.5 Acyl Acid Amido Synthetase from <i>Arabidopsis thaliana</i> . Indole-3-acetic acid-amido synthetase GH3.5 |
| CcGH3.9   | Cc01_g20620 | Monomer     | 54.66 %           | 0.92     | -0.66 | 7dk8.1.A | X-ray,<br>1.99 Å | Probable indole-3-acetic acid-amido synthetase GH3.8 Crystal structure of OsGH3-8 with AMP                                           |
| CcGH3.17c | Cc00_g04520 | Monomer     | 50.79 %           | 0.98     | -1.45 | 6e1q.1.A | X-ray,<br>2.15 Å | AtGH3.15 acyl acid amido synthetase. AtGH3.15 acyl acid amido synthetase in complex with 2,4-DB                                      |
| CcGH3.17d | Cc00_g04530 | Monomer     | 50.35 %           | 0.98     | -1.28 | 6e1q.1.A | X-ray,<br>2.15 Å | AtGH3.15 acyl acid amido synthetase. AtGH3.15 acyl acid amido synthetase in complex with 2,4-DB                                      |
