# Supplementary material for: Genome-Wide Analysis, Modeling, and Identification of Amino Acid Binding Motifs Suggest the Involvement of GH3 Genes during Somatic Embryogenesis of Coffea canephora
Source: MDPI journal article supplement (doi:10.3390/plants10102034), 2021-09-28
Supplement: s1 [file s1]

**Table S4.** Gene-specific primer sequences used for Real-time qRT-PCR amplification.

| Gene               | Forward primer            | Reverse primer        |
|--------------------|---------------------------|-----------------------|
| <i>CcGH3.1a</i>    | TGATCCAATATGCTCCCTTGCT    | GTACAATCCGGCATGCGTAG  |
| <i>CcGH3.1b</i>    | GAGTTGTCAGTTGGGGTCCT      | GCCCCTCTAGAGACAGCAAA  |
| <i>CcGH3.1c</i>    | CCGGGGTGCTAAACCCTAAA      | CCCTGCCGACGCTGTAATAA  |
| <i>CcGH3.1d</i>    | AACCTTTACGTGCCGGGATT      | GCAAAGCATTGCGGTACATA  |
| <i>CcGH3.3</i>     | CTCGGACAAGACAGACGAGG      | GTCCCGCTTTTTACCACACG  |
| <i>CcGH3.5</i>     | ATGCTGGGAACCTTGCCTCTT     | TTCTTGCCCCAGCTTGACTT  |
| <i>CcGH3.6a</i>    | CTGGCAGAAGTTTTAGAGGCTG    | TTCTGAGGTCACAGGCAGGA  |
| <i>CcGH3.6b</i>    | GCTAGTGGCTCGTCCTGTTT      | GGGTCGGTAATTCGTGGGTT  |
| <i>CcGH3.9</i>     | GCCGTATTTGCATCTGCGTT      | CCCGTGATCACAGCCTCAAT  |
| <i>CcGH3.17a</i>   | GTCTCCTTGCTACTCTTTGAACTAA | CCGAGGCGAAAAATGTACCA  |
| <i>CcGH3.17b</i>   | CCTTGAACCACTTGGGCTCT      | GCACGTTGAATGTTCTGATGC |
| <i>CcGH3.17c</i>   | GCCTCGGGTTTGCTAAGGATA     | TGGTCCTTGGCCAGATCTTC  |
| <i>CcGH3.17d</i>   | GAGCTACTGATCAGCTCGGG      | CAAAGAACAGCGCTTTCCCA  |
| <i>CcGH3.17e</i>   | TGGTTCTTCAGAGGCGTTGT      | GCATCTTTCCTGTTGGTGCAG |
| <i>CcGH3.17f</i>   | GGATGGAGAGCCATCTCGGA      | GCTTTCCCATCGTTCAAGCC  |
| <i>CcGH3.17g</i>   | CCACACTCCTGGTGGCTTAG      | GCAAACCCGAGGCGAATATG  |
| <i>CcGH3.17h</i>   | GGAGCTTCAACTCAGATCAAACG   | GTCCATGAGCACGTTGAATGT |
| <i>CcGH3.17i</i>   | CAAAGTTGTGCAACGGCGTA      | CCTCTCAAGCACTGCAGCTA  |
| <i>Cyclophilin</i> | GATGGCGTGCCTCTTGGTAG      | AGCCAAATTGCTTCCAGCCT  |
