# Supplementary material for: Genome-Wide Analysis, Modeling, and Identification of Amino Acid Binding Motifs Suggest the Involvement of GH3 Genes during Somatic Embryogenesis of Coffea canephora
Source: Plants (Basel). 2021 Sep 28;10(10):2034. doi: 10.3390/plants10102034 (PMC8539013; doi:10.3390/plants10102034)
Supplement: Supplementary file 1 [file plants-10-02034-s001.zip]

Archive with 6 entries (6 files):
- Figures_Suppl.pdf
- Table S1.xlsx
- Table S2.pdf
- Table S3.xlsx
- Table S4.pdf
- Table S5.pdf
