# Supplementary material for: Genome-Wide Analysis, Modeling, and Identification of Amino Acid Binding Motifs Suggest the Involvement of GH3 Genes during Somatic Embryogenesis of Coffea canephora
Source: Plants (Basel). 2021 Sep 28;10(10):2034. doi: 10.3390/plants10102034 (PMC8539013; doi:10.3390/plants10102034)
Supplement: Supplementary file 1 [file plants-10-02034-s001.zip › Table S1.xlsx]

## Sheet: Hoja1
Table S1. Complete sequences of GH3 genes in C. canephora. The complete sequences were downloaded directly from the coffee tree database available online and were viewed in the UGENE software. A total of 6 different GH3 members were observed, with several copies of each, obtaining a total of 18 CcGH3 members. The nomenclature of these genes was performed based on their relative homology with the …
Gene name	Locus_ID	Length (bp)	TAIR_Homologs	Start	End	Complete sequence
CcGH3.1 a	Cc00_g22520	2581	AtGH3.2	142656917	142659058	ATGGAAACTGATTGGAATACGAAGGCTCTAGAGTTCATTGAAGAGATGACCAAAAATGCTGGTGAAGTCCAGAAGATGGTCTTGGCAGATATACTAAAACAGAATGGTGAAACTGAGTATCTACAACGATTCAATCTTGATGGTGCAACTGACACTAAGACATTTACATCCAAAGTTCCATGTATTACTTACGAGGATATTCGGCCTGAAATTCAGCGTATGGAAAACGGTGATCGTTCTGCAATCTTGACTGCTCTACCTGTTTCTGACTTTTTGCTCAGGTGAATTTTGTTACATATATACACTTAACACCATATGTTCTTCAAGAAAATTCTTTTTTCACTATTTGATATGCAGACCAGTTTCTTTAAAAGACTGCTAATAAACAAAATTTTCATA…
CcGH3.1b	Cc00_g01360	2740	AtGH3.1	8822291	8824450	TATCTAACAAACTTTTCGTCCTAAATTTCTAACATTTTAATTCAGTCATTCTTTCTTATTCAGGTTTGAGTGCACATCTCTCTCTCTCTCTCTCTACACACACACACACACACACACATATTCCCAAACTACATCTACATCCCACAATCCATCCTTTTCTTTAACATTGCTCAAGTCATTATGGAAACTGATTGGAATACGAAGGCTCTAGAGTTCATTGAAGAGATGACCAAAAATGCTGGTGAAGTCCAGAAGATGGTCTTGGCAGATATACTAAAACAGAATGGTGAAACTGAGTATCTACAACGATTCAATCTTGATGGTGCAACTGACACTAAGACATTTACATCCAAAGTTCCATGTATTACTTACGAGGATATTCGGCCTGAAATTCAGCGT…
CcGH3.1c	Cc07_g06610	2750	AtGH3.1	4821858	4824041	ATTTCCCCACCCATTAATCCCCTCACTTCCTCTACAGTTTCTTATTTCTTTCTCTCTTGATAATTAGTTACTCGCTCGGATATGGCTGTTGACTCCACCCCGCTTGCCCCTCCTGCATGTGAGAATGATGCCAAGGCTCTTCAGTTTATTGAAGACATGACCAGAAACTGTGATTCCGTGCAGGAGAAGGTTTTGGCTGAAATCCTTAGCCGGAATGCCCAAACCGAATACCTCAGGGATTTCAAACTTGGAGGGGCAACCGACAGGGACTCCTTCAAGTCCAAAATTCCTGTTGTGACTTACGAGGATCTTCATCCCTATATCCAACGTATTGCTAATGGTGATCGCTCTCCAATTCTCTCGTCTCACCCCATCTCTGAATTCCTCACTAGGTATGCT…
CcGH3.1d	Cc02_g19460	1367	AtGH3.1	17549243	17550429	CTGCAAATCTCATCTCACCACCGGGCCCTTCTTCAAAAAAAAAAACAAACTCTTCCCTCATCCCCATCATTAATAATTGCTCTCCCCTCCTCCTTCCCTTCCATCCCCAACCCACCAAAATATTACTAATAAACAACAAACAAAGAAAGAAATCATTAGCTGAATTTTGAGGTACTTGAAATGGCCGTGGATTCAGTCTTGTCTTCGCCCTTGGGTCCTCCAGCGTGCGAGAAAGACGCAAAGGCACTCCGATTCATCGAGGAAATGACCCGAAATGCCGACGTGGTTCAGGAGAAAGTGTTGGCCGAAATACTGACGCGAAATGGCCAAACTGAGTACCTTCAGCGCTTCAAACTTGGTGGCTTCACCGACCGCCTCACCTTCAAGTCCGAAATCCCA…
CcGH3.3	Cc02_g19470	862	AtGH3.2	17550591	17551298	ATGGCCTACTTCGAGTTCCTGCCCCACGATCCCAACTCGCCCGGGTTCACGCGCGACTCGCCTCCCAAACTCGTTGACCTGGCGGATGTTGAAATTGGTAAAGAATACGAGCTAGTAATCACTACATATGCTGGATTGTACAGGTACCGCGTGGGCGACATTCTCCGTGTCACCGGATTTCATAATTCAGCGCCTCAGTTCCGCTTTGTGAGGAGAAAAAATGTTTTGCTGAGCATCGACTCGGACAAGACAGACGAGGCCGAGTTACAAAAGGCGGTTGAAAATGCTTCGCAGCTGTTGCGCGAATATAATACTAGCGTGGTGGAGTACACGAGTTTTGCAGACGCGAAGACGATTCCGGGTCACTACGTGATTTATTGGGAGTTACTGGTCAAGGAC…
CcGH3.5	Cc05_g06700	3771	AtGH3.10	21465217	21468524	TCTACAAGCAGTCGTACAAATTGTGTTTGAAGATTTTGTTAGACTTGTTGAGCTTTTTGATAGAGGACAAGATCAAGGACAAGATACCAAGAGGATCTTTCAGTATTCATGTGGGCACAGGGCACCTATTGTGGTTTTTTTTTCCTCGCTTAACTTGAATTGGCAGAGAAAAAGATAACTTCCACTAACAACTATTGCATTTTTGTTGCTTATAAGATTGAGCAATATTGCTGCATGATAGCTGCAACATCATCAGCCTAAATGGAGAGAAATGGAGAGTATGATATCATCGGTTGGTTTGATGAAGTAGCTGAAACCGCAGATTCAGTTCAGACTCAAACACTCAGCCAAATTCTTCGGCTGAATTATGGAGTTGAGTACCTCAAGAAATGGTTTCGG…
CcGH3.6a	Cc05_g05640	2379	AtGH3.6	20228391	20230769	ATGCCAGAGGCACCTAAGGTATCATCAACTAACCATCAGGAGAGTTGTCTTGATGATAAGAATCAACAGGTTCTTCAATTCATCGAAGATGTTACTAGCAATGCAAAAGAAGTTCAAAGAAGAGTTCTTAATGAAATTCTTTCGCGTAATGCTGGAGTTGAGTATCTGCAAAGGCATGGCTTCAATGGACAGATTGACTATGAAACATTCAAGAGCACCTTCCCAGTTGTCACGTATGATGATCTTAAACCAGATGTTGATCGTATAGCCAATGGTGATACTTCCCCCATACTTTGTTCTCAGCCCATCTCAGAGTGCCTAACAAGGTTAGTCCATCTTCAGTTGCTACACAAAAGTAAACTTTAATTCATCACAGACCGGATAAGTACAAGGCTCTTC…
CcGH3.6b	Cc05_g12940	2430	AtGH3.6	26669847	26672091	TGCCATTTCTCTATATAAACCCCCCTCCTCTCTTCCCTTCTCCCCCACACACCCCATACCCGGAACAGCCAGCAGAGGTAGAAACTCTTGTCCTCCGTCCCTCACTCCTCCCTCCTTCCTTTCATAGTTATTTTCTCTGTCACCAATTTGCCAGTATTTCTTTTCCTACCACAAGAGCAATCAATATGCCTGAGGCACCAAAAGATGAGGGGGCTTATGCTCATGCTCACGACACTAACACTATCTACAGTGTTGCTGAGGAGAAAAACAAGAAATTTCTTCAGTTCATTGAAGAAGTCACCGCTAACGCTGACGAGGTCCAAAAAAGGGTTCTTGCTGAAATCTTGTCTAGGAATGCCCATGTCGAGTGCTTAAAAAGACATGGCCTTAATGGTCAGA…
CcGH3.9	Cc01_g20620	2990	AtGH3.9	37172864	37175503	TAACATACATTCAACAGCAAAGTGTTGTTTTTCTCAGCATATAGAGAGAACAGTGCGTCCTTGCTGTTTGTTTCTAGCTCCAGCTAGCTATCTAACTGACGCCCCAAATTTGAATAGATAGGATAGGATATTTATCATTTATGGTGATGGACGGCAAGAAATTAGAGTACAAGGGCGAGAAGGCATTGAAGGAGCTGGAGAAGCTCACAGCAAATGCAGCTGAGGTTCAGGAGGAGGTCTTGAAGATGATCCTGACGCAGAATAAGGGGGCTGAGTACCTGAACAAGTACATGACGGGAGTGGAATCAAAATCACAGGTACCACATTTCAAGCGTTGCGTGCCGGTGACAACGTACAAGGATGTCCGTCCCTACATCCAGAGAATTGCCAATGGAGACA…
CcGH3.17a	Cc00_g04490	6755	AtGH3.17	34209474	34211882	TGATGAATAGGGACCGACGGAAACAACTTCCTGTATCACTGGCAATTGGTCAACCTTGGCAGCTTCACTGCTCCCTGGTCCCTGCATCACTGAATAGCAGTCGACAAAAATTAGGTCTCAAAGGCTTCATTTTCTGCAAGATTTTTGCGGTGGAATCATAGCCCAATCAAGATTTTTCCAGGTGAGGTATATTTGCGCCGTAGGATTATATGCAATCATGTCCCTTTTAGATGAGGTATATTGGCTTCCTTGATTAATTTCCTCTTGTTGTTTCTGATGTGATTCATATGTTTTTCTTTTTTCCTATGCTGTATGCTTACTTGGCCATATATTTACATTTTTTTTTCGAATGCTATGCATTTGTAGGTCGAAAGTCAACAAGATTCATACGGTCAAGTT…
CcGH3.17b	Cc00_g04500	1516	AtGH3.17	34230766	34232281	ATGACATATGGAGGATTTCAAGGTGCTTCATATGACATATGGGTAATCAAATTTTTCAAGGAAAATTGGCAAGAAATGTCTTCGAACATAAGAACTGGACAAATGAGTGATTGGATCACTGACCCTAACTGCAAAAGGGCTGTCTCCTTGATTTTGAGCAAACAAATGCCGGACTTGGCTGATTCAATTGATCGTGTATGCCAAGAAAAGTCTTGGGAAGGGATAATTAAGAAGATCTGGCCAAGGACCAAGTATGTCATGGCCATTATTACAGGGTCCATGGCACAATATATCCCTGCGCTTGAGGTCTATACGGGTGGGTTACCTGTAGTTTCACCAGTTTATGGTTCTTCAGAGGCAGTTTTTGGGATTAACATGAAACCTTTGTGCCGTCCTTAT…
CcGH3.17c	Cc00_g04520	2705	AtGH3.17	34265456	34267828	ATGCTGCCAACTTTTGATCCAACAGATACTGAAGCTGGTTCGAGGATTTTGGAGGATATAACCAGCAATGCTGGTCATATACAAGAACAGGTCCTGGAGGAGATTTTAACTAAAAATGCAAGCACTGATTACTTGAAGGGTTTTCTTAATGGTCACTCTGATAAGGGACTATTCAAGAATAAAGTTCCTGTGGTAGATTATGAAGATATCAAGATTTACATCGATCGAATTGCACTGGATGGAGAGCCATCTCGGATTTTAACTAATGAATCCATTACTGAGCTACTCAAAAGGTAAATTCAGTTTCTTTGTTTTGTTCTAATTAGATGAAAGGAAACTCCTGAATGGAGTGAGATCAATAATGCTGAAGCACGAGTCATTTCTGTTCTTTTTCATGAA…
CcGH3.17d	Cc00_g04530	4103	AtGH3.17	34279931	34282340	ATGAATAAGGACCGACGGAAACAACTTCCTGTATCACTGGCAATTGGTCAACCTTGGCAGCTTCACTGCTCCCCAGTGCCTGCATCACTGAGTAGCAGTCGACAAAAATTAGGTCTCAAAGGCTTCATTTTCTGCAAGATTTTTGCGGTGGAATCATAGTGCAATCAAGATTTTTCCAGGTGAGGTATATTTGGGCCGTAGGATTATATGCAATCATGTTCCTTTTAGGTGAGGTATATTGGCTTCCTTGATTAATTTCCTCTTGTTGTTTCTGATGTGATTCATATGTTTTTCTTTTTTCCTATGCTGTATGCTTACTTGGCCACATATCTACAATTTTTTCGAATGCTTTGCATCTGTAGGTCGAAAGTCAACAAGATTCATGCAGTCAAGTAGTTA…
CcGH3.17e	Cc00_g04540	1774	AtGH3.17	34297176	34298627	ATGTCTTCCAACATAAGAACTGGACAAATGAGTGATTGGATCACTGACCCTAACTGCAAAAGGGCTGTCTCCTTGATTTTGAGCAAACAAATGCCGGATTTGGCTGATTCAATTGATCTTGTATGCCAAGAGAAGTCTTGGGAAGGGATAATTAAGAAGATCTGGCCAAGGACCAAGTATGTCATGGCCATTATAACAGGGTCCATGGCACAATATATCCCTGCGCTTGAGTTCTATATGGGTGGGTTACCTGTAGTTTCACCACTTTATGGTTCTTCAGAGGCGTTGTTTGGGATTAACATGAAACCTTTGTGCAGTCCATATGATGTCTCTTATACTTTTATACCAAACATGGCCTACTATGAGTTCTTACCAATTGACAATCATCAAGATCCAAAC…
CcGH3.17f	Cc00_g04550	1284	AtGH3.17	34298709	34299719	TAAGGAAATTATATGGAGATCCAATTCAATTCATATAGCAACTCAAATGACTCGAACTCAATTTGAATTCGATTTTGACTGAACTCAAGCATGGATATAGATCCATAAGAGCTCGAACGAAGGTACATTCAAGATCATTTGGTGATTTTGGATTGTGCAAGTGATGAGCATAGCATAAGGAGACTAAGCAACTCAATGAGTTTTTCTGTTTACAAAATTACAAATTAACAATGGTAACATACAGCACGCTAACTAGGCATCTTGGAGAAGGGAATGAGGATGAAAGGATGGATCACCTGGGCAATGGGTTTAAAAGAGCTTAACCATGGCGTGAATCTTTTCCTCAAGACAATGTAGTTGAGCGTGCTTATTCATCAATTAATTCCCTGCATATTTCCC…
CcGH3.17g	Cc00_g28970	1939	AtGH3.17	178935475	178936518	TACTGAAACAGATTCTTGGGAGAAAGAGGTATTCTTGTTGATGTTTCAGCCAGCCAGCAGAGTTGGAGTCATACTGAAAATTTTGGGGGAAGCCAGCAAAGGGGATGGCTTGTCAACTTTTGAGTTCATAGGCAGTGGAGTTATTGGAGCTTTGCTGAATTACTTTGCGTCCGGATATTTCTCCAAGTATGGAATTTTAGAAGCTGAGTTTCCTGAGCTGCAGCAACAAGCTATCAGAAGGTACAAATCTAGACTAATTTGATTCATGGCCAAACATTGGGAACTAAAACTGCAACTCCCCTGCAAACAACTTCCTGCTTCACTGCTCCCTAGTGCCTGCATCACTGAATAGCAGTCGACAAAAATTAGGTCTCAAAGGCTTCATTTTCTGCAAGATTT…
CcGH3.17h	Cc00_g28980	1961	AtGH3.17	178936581	178938006	ATGAGTGATTGGATCACTGACCCTAACTGCAAAAGGGCTGTCTCCTTGATTTTGAGCAAACAAATGCCGGATTTGGCTGATTCAATTGATCTTGTATGCCAAGAAAAGTCTTGGGAAGGGATAATTAAGAAGATCTGGCCAAGGACCAAGTATGTCCTGGCCATTATTACAGGGTCCATGGCACAATATATCCCTGCACTTGAGTTCTATACGGGTGGGTTACCTGTAGTTTCACCACTTTATGGTTCTTCAGAGGCATTTTTTGGGATAAACATGAATCCTTTGTGCAGTCCTTATGATGTCTCATATACTTTTATACCAAACATGGCCTACTATGAGTTCTTACCAATTGACAATCATCAAGATCCAAACTGCACCTACAGGAAAGATGCTCATTTG…
CcGH3.17i	Cc10_g16320	3565	AtGH3.17	27266812	27269856	ATGAGAAAAATTTGCTGTTGCTGATCATGGCTTTGTGGGTCTAGATTAAATATTGTTGCGTGCCTGGTATCGGAATCAGATGCATAGCTATCTACACGGAACACGGGATACTGCTACTAGTGAAATATCGGAATCAGATGCATAGCTGTCTTCTTGTTCAATTGATTCCCTTGATTCTTCACGGAGTCCGTTCATCTTAATCACCGATTAATTGTCTGTCCAAGAAACAGATAAAAGGCAGTTGAATTGATGATGATGGATTTTGATTATCAGGCTTCAACTTAGACTACTGCAGCAGCAGATAGCTAGCTAGCTGTAAACATGCCGTTGCCAGCTTTGGATTCAACAGATAGCGAAGCGCTTCTGGAGCTTTTGGAGAAGGTGACTGCTGATGCTAGT…
