# Supplementary material for: Genome-Wide Analysis, Modeling, and Identification of Amino Acid Binding Motifs Suggest the Involvement of GH3 Genes during Somatic Embryogenesis of Coffea canephora
Source: Plants (Basel). 2021 Sep 28;10(10):2034. doi: 10.3390/plants10102034 (PMC8539013; doi:10.3390/plants10102034)
Supplement: Supplementary file 1 [file plants-10-02034-s001.zip › Table S3.xlsx]

## Sheet: Hoja1
Table S3. The accession numbers of GH3 used in the construction of phylogenetic trees
C. canephora			A. thaliana			S. lycopersicum			O. sativa			V. vinifera
CcGH3.1a	Cc00_g22520		AtGH3.1	AT2G14960.1		SlGH3.1	XM_004231843		OsGH3.1	LOC4327043		VvGH3.1	GSVIVT01000176001
CcGH3.1b	Cc00_g01360		AtGH3.2	AT4G37390.1		SlGH3.2	Solyc01g107390.2.1		OsGH3.2	LOC4326893		VvGH3.2	GSVIVT01014545001
CcGH3.1c	Cc07_g06610		AtGH3.3	AT2G23170.1		SlGH3.3	Solyc02g064830.2.1		OsGH3.3	LOC4324650		VvGH3.3	GSVIVT01014545001
CcGH3.1d	Cc02_g19460		AtGH3.4	AT1G59500.1		SlGH3.4	Solyc02g092820.2.1		OsGH3.4	LOC4339234		VvGH3.4	GSVIVT01027971001
CcGH3.3	Cc02_g19470		AtGH3.5	AT4G27260.1		SlGH3.5	XM_004240036		OsGH3.5	LOC4339756		VvGH3.5	GSVIVT01014545001
CcGH3.5	Cc05_g06700		AtGH3.6	AT5G54510.1		SlGH3.6	XM_004244120		OsGH3.6	LOC4337780		VvGH3.6	GSVIVT01001112001
CcGH3.6a	Cc05_g05640		AtGH3.7	AT1G23160		SlGH3.7	Solyc07g063850.2.1		OsGH3.7	LOC4341111		VvGH3.7	XM_002272524
CcGH3.6b	Cc05_g12940		AtGH3.8	AT5G51470		SlGH3.8	XM_004243271		OsGH3.8	LOC4343785		VvGH3.8	XM_002270966
CcGH3.9	Cc01_g20620		AtGH3.9	AT2G47750.1		SlGH3.9	Solyc07g063850.2.1		OsGH3.9	LOC4343704		VvGH3.9	XM_002268242
CcGH3.17a	Cc00_g04490		AtGH3.10	AT4G03400		SlGH3.10	NM_001368308		OsGH3.10	LOC_O38860
CcGH3.17b	Cc00_g04500		AtGH3.11	AT2G46370		SlGH3.11	NM_001368308		OsGH3.11	LOC4344247
CcGH3.17c	Cc00_g04520		AtGH3.12	AT5G13320		SlGH3.12	XM_004253430		OsGH3.12	LOC107275638
CcGH3.17d	Cc00_g04530		AtGH3.13	AT5G13350		SlGH3.13	XM_004248028		OsGH3.13	Os11g0528700
CcGH3.17e	Cc00_g04540		AtGH3.14	AT5G13360		SlGH3.14	XM_004248028
CcGH3.17f	Cc00_g04550		AtGH3.15	AT5G13370		SlGH3.15	Solyc12g005310.1.1
CcGH3.17g	Cc00_g28970		AtGH3.16	AT5G13360
CcGH3.17h	Cc00_g28980		AtGH3.17	AT1G28130.1
CcGH3.17i	Cc10_g16320		AtGH3.18	AT1G48670
			AtGH3.19	AT1G48660
